# Supplementary material
Source: PubMed Central journal article supplement (PMC6777813)
Supplement: jciinsight-4-130621-s163.pdf [file jciinsight-4-130621-s163.pdf]

A

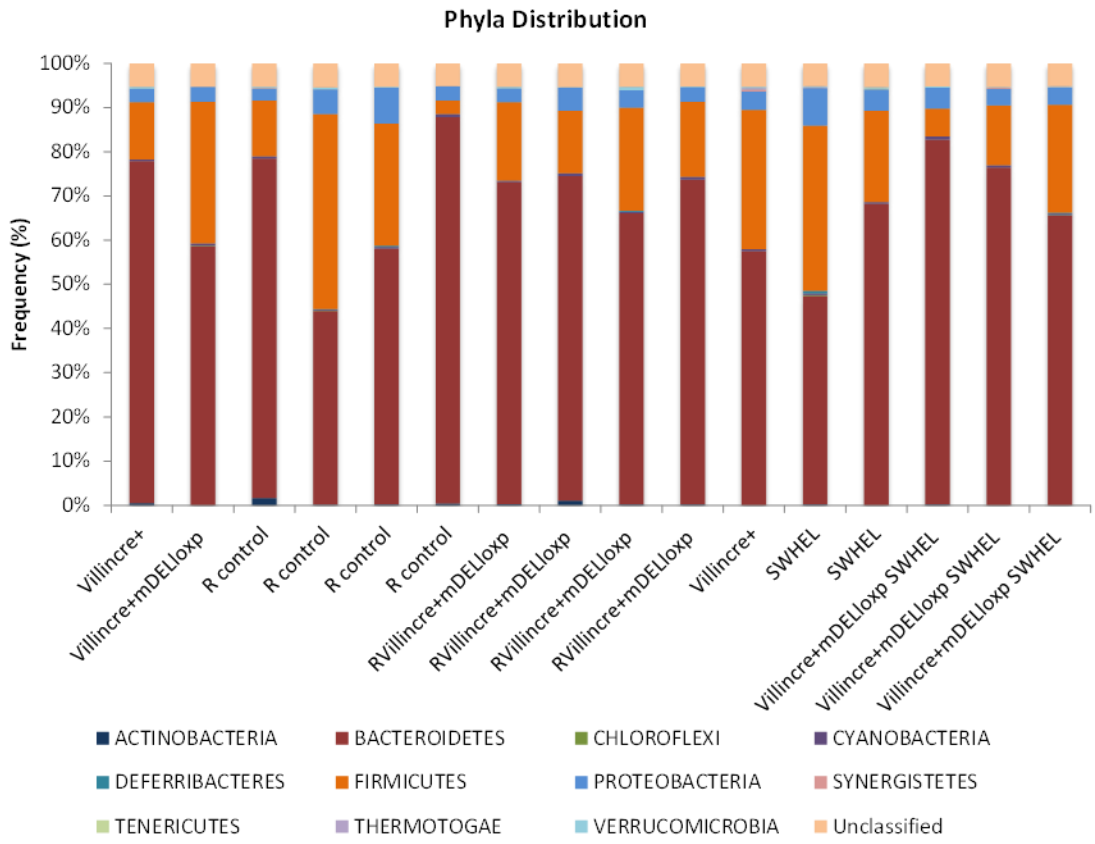

B

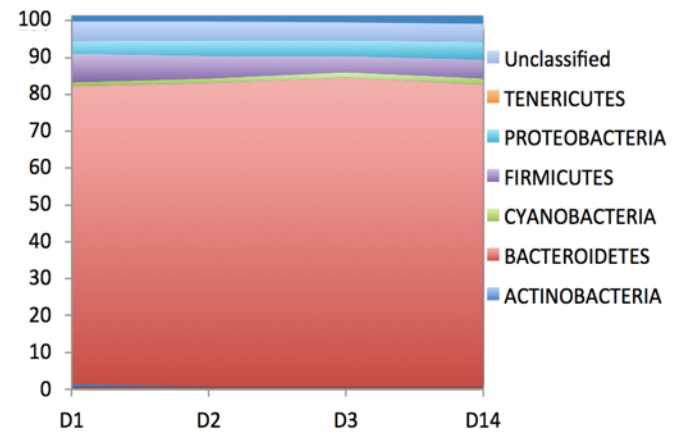

Bacteria phyla distribution over a 14 day period after administration of 25 mg of HEL at day zero

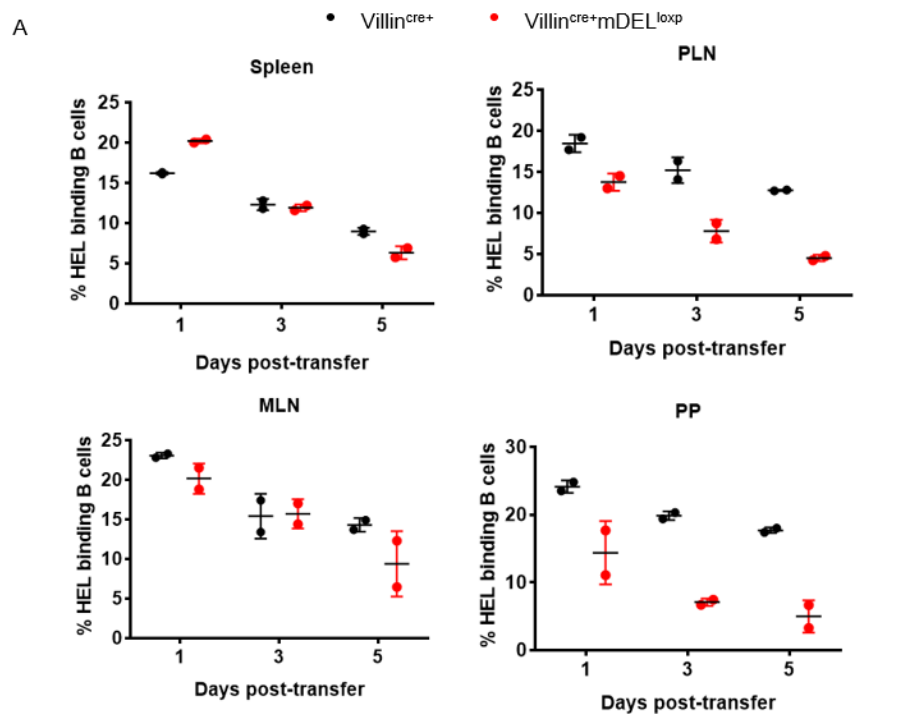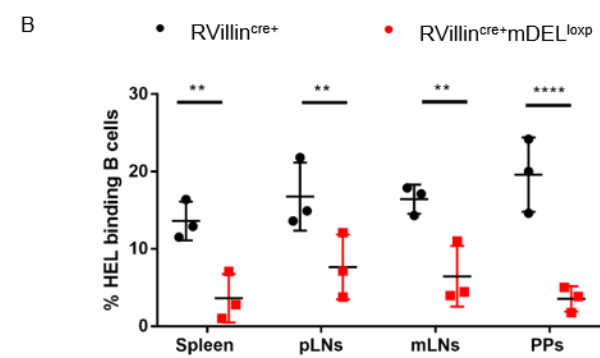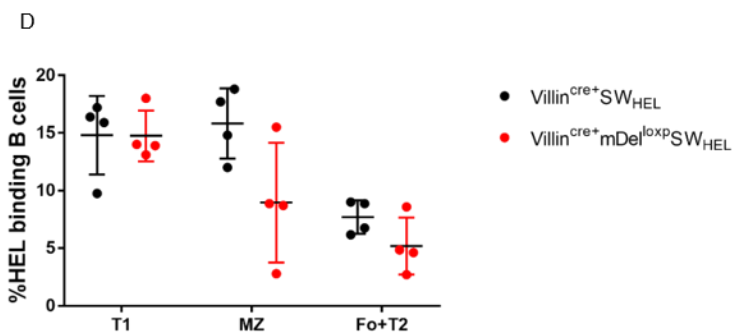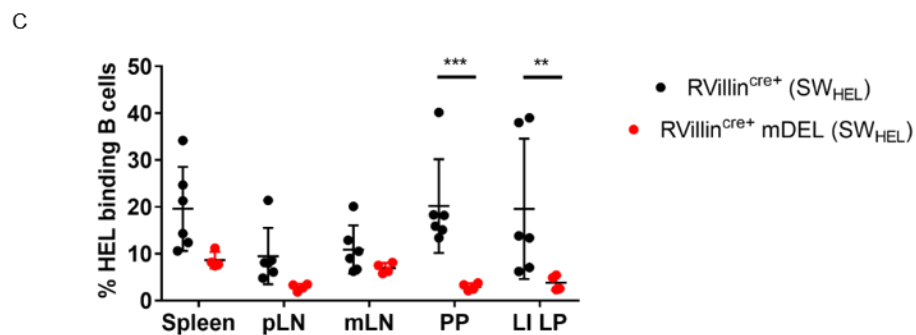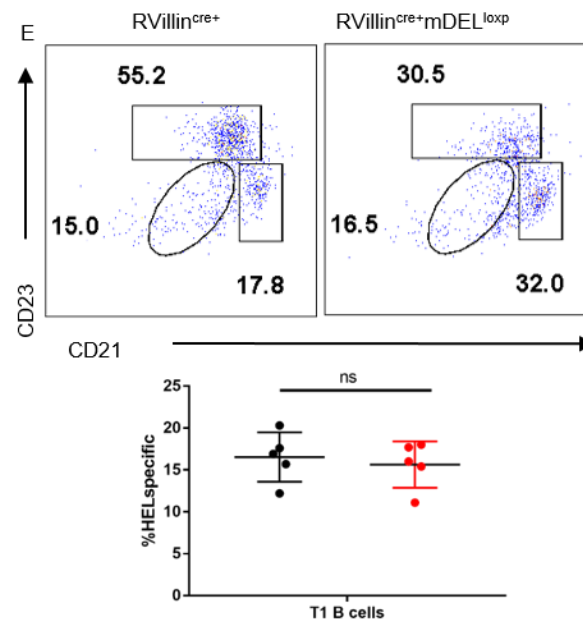

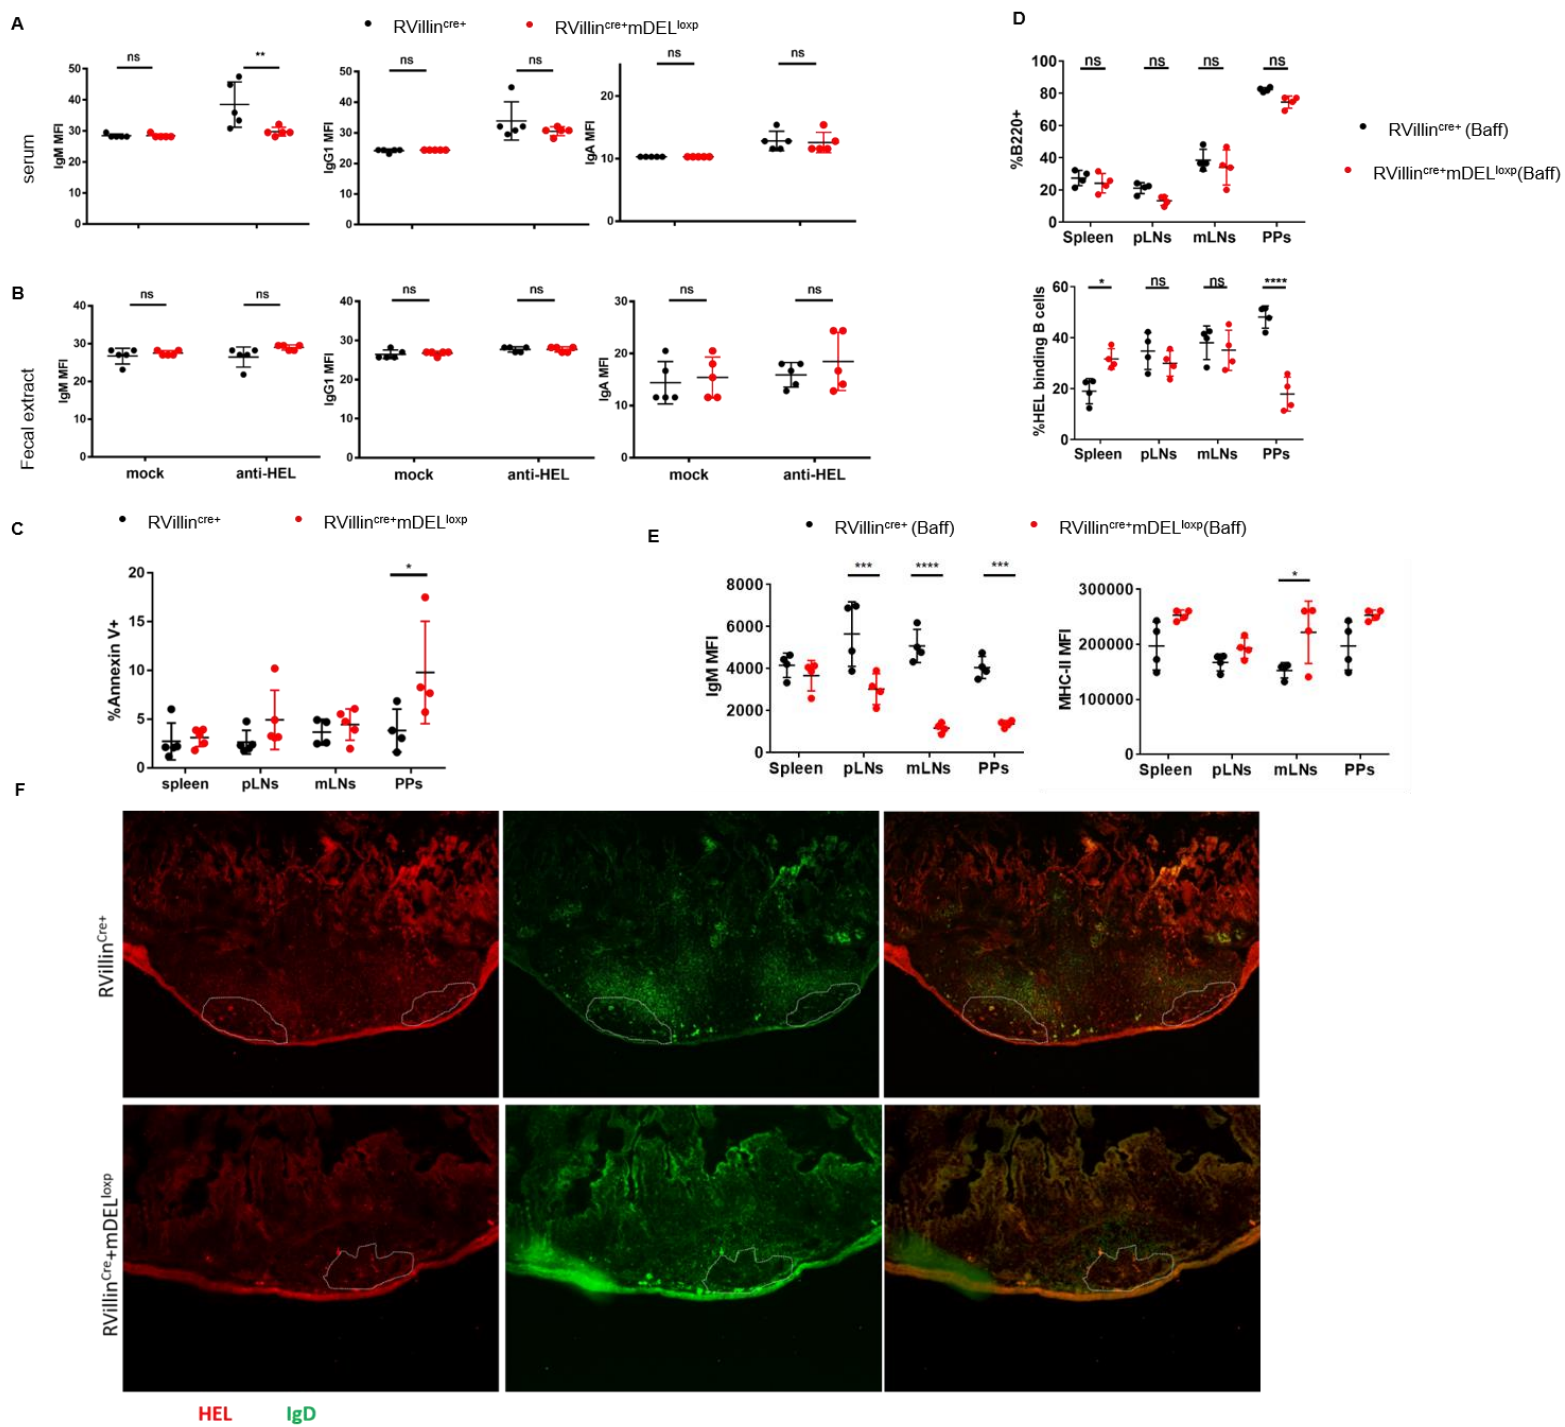

A

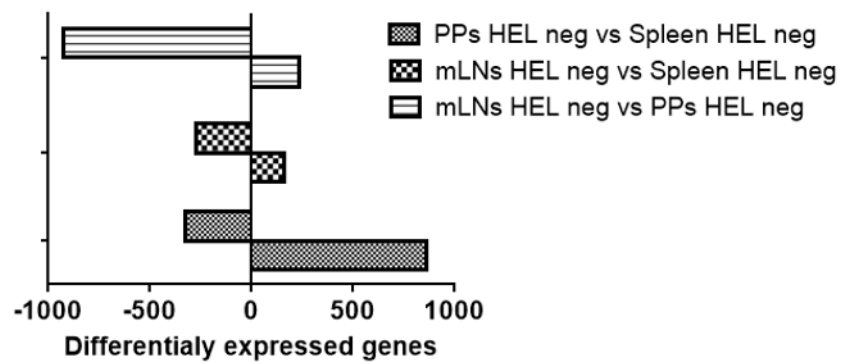

B

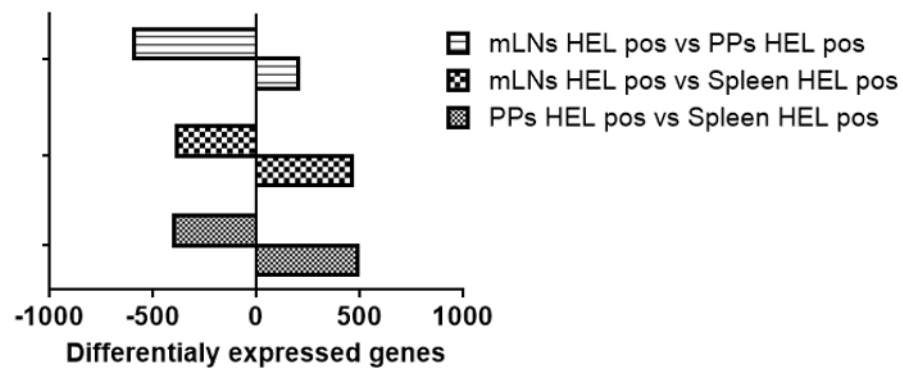

A

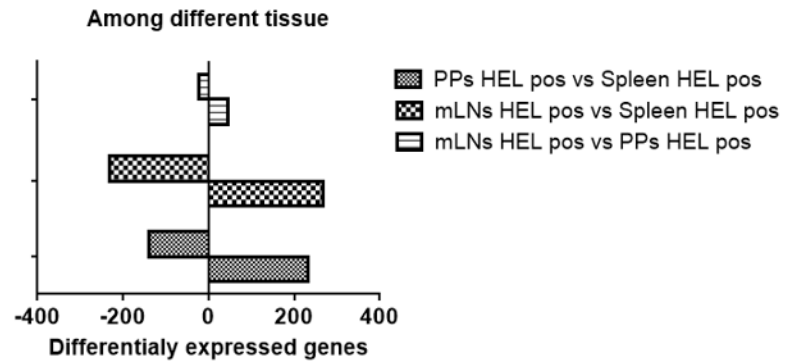

BCL2-HEL specific cells

B

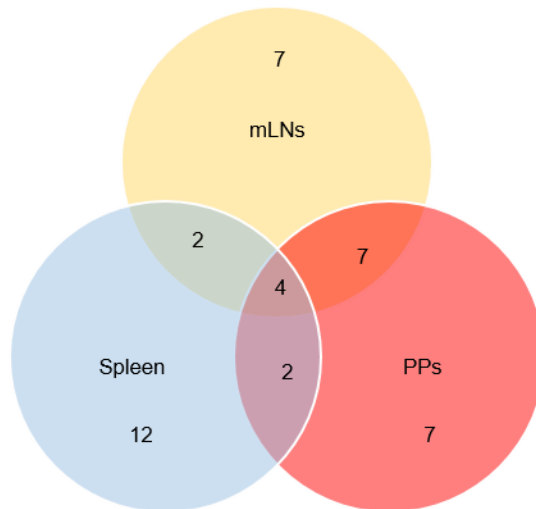

Unique Pathways in BCL2-HEL specific cells in PPs

*Stimulation of TGF-beta signaling in lung cancer**TGF-beta-dependent induction via SMADs**TGF-beta-dependent induction via MAPK**HBV-dependent transcription regulation leading to HCC**Inhibition of TGF-beta 1 signaling in early colorectal cancer**Development\_ERK5 in cell proliferation and neuronal survival**FoxO signaling pathway*

A

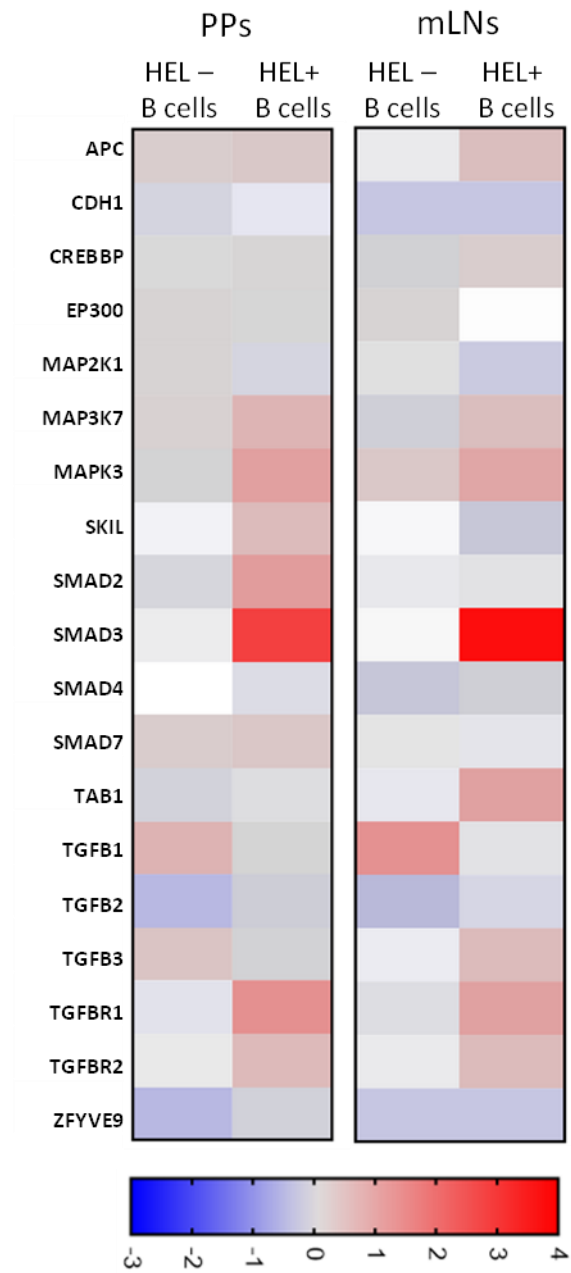

A

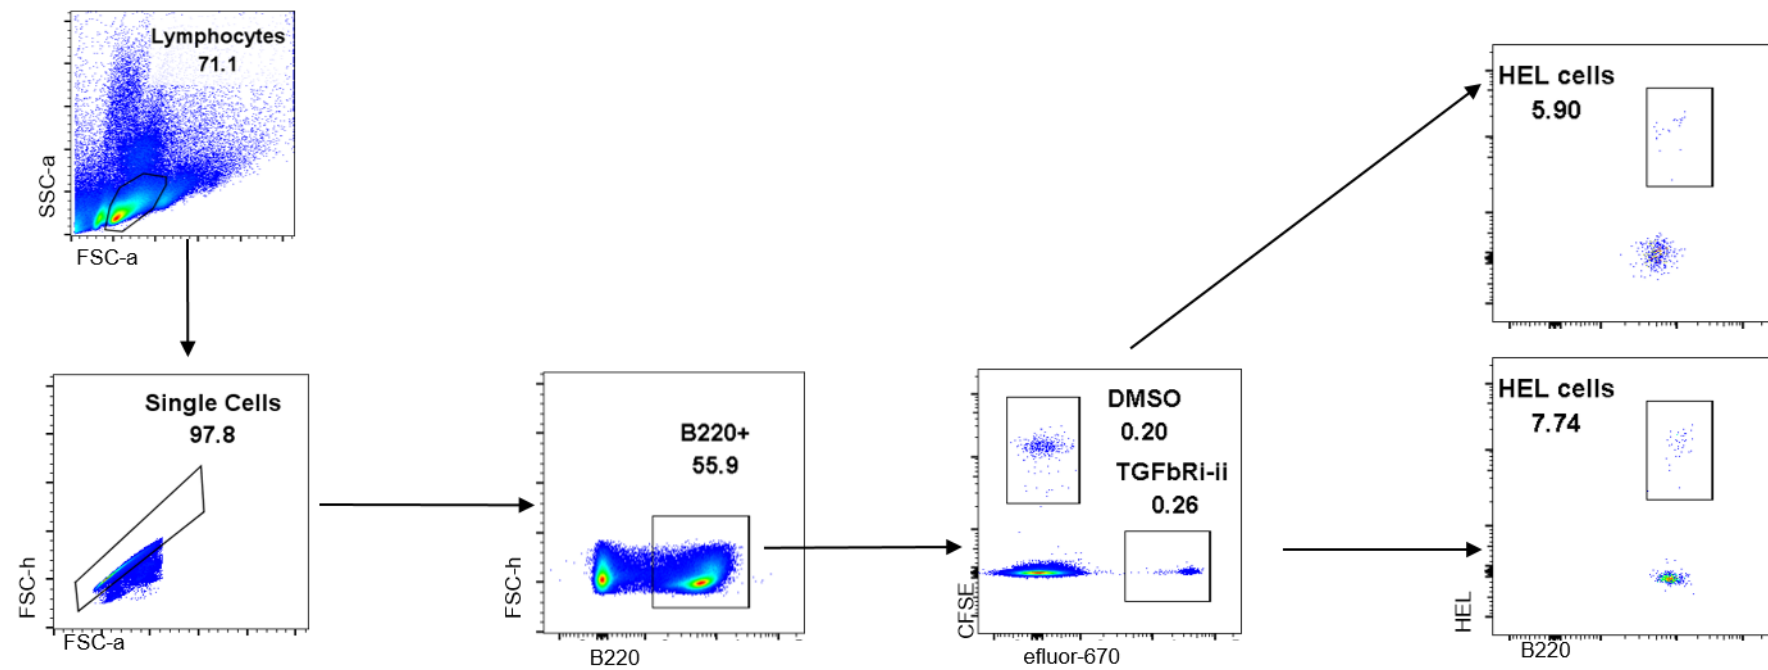

Table 1

| Category                           | Criterion                                                                         | Definition                                                                                                                                                                                                                                                | Score Value1 | RVillinCre+ (Bcl2) |     |     |     |     |     | RVillinCre+mDELloxp (Bcl2) |     |     |     |     |     |     |   |   |
|------------------------------------|-----------------------------------------------------------------------------------|-----------------------------------------------------------------------------------------------------------------------------------------------------------------------------------------------------------------------------------------------------------|--------------|--------------------|-----|-----|-----|-----|-----|----------------------------|-----|-----|-----|-----|-----|-----|---|---|
|                                    |                                                                                   |                                                                                                                                                                                                                                                           |              | 950                | 937 | 927 | 498 | 504 | 511 | 926                        | 925 | 922 | 920 | 500 | 502 | 503 |   |   |
| I,<br>Inflammatory cell infiltrate | Severity                                                                          | Leukocyte density of lamina propria area infiltrated in evaluated hpf:                                                                                                                                                                                    |              |                    |     |     |     |     |     |                            |     |     |     |     |     |     |   |   |
|                                    |                                                                                   | Minimal: <10%                                                                                                                                                                                                                                             | 1            | 1                  |     | 1   | 1   | 1   |     | 1                          | 1   |     | 1   |     | 1   |     | 1 |   |
|                                    |                                                                                   | Mild: 10-25%; scattered neutrophils                                                                                                                                                                                                                       | 2            |                    |     |     |     |     | 2   |                            |     |     |     |     |     |     | 2 |   |
|                                    |                                                                                   | Moderate: 26-50%                                                                                                                                                                                                                                          | 3            |                    |     |     |     |     |     |                            |     |     |     |     |     |     |   |   |
|                                    | Marked: >51%; dense infiltrate                                                    | 4                                                                                                                                                                                                                                                         |              |                    |     |     |     |     |     |                            |     | 2   |     |     |     |     |   |   |
|                                    | Extent                                                                            | Expansion of leukocyte infiltration:                                                                                                                                                                                                                      |              |                    |     |     |     |     |     |                            |     |     |     |     |     |     |   |   |
|                                    |                                                                                   | Mucosal                                                                                                                                                                                                                                                   | 1            | 1                  |     | 1   | 1   | 1   |     | 1                          | 1   |     | 1   |     | 1   |     | 1 |   |
| Mucosal and submucosal             |                                                                                   | 2                                                                                                                                                                                                                                                         |              |                    |     |     |     | 2   |     |                            |     | 2   |     |     | 2   |     |   |   |
|                                    | Mucosal, submucosal and transmural                                                | 3                                                                                                                                                                                                                                                         |              |                    |     |     |     |     |     |                            |     |     |     |     |     |     |   |   |
| II,<br>Epithelial changes2         | Hyperplasia                                                                       | Increase in epithelial cell numbers in longitudinal crypts relative to baseline epithelial cell numbers per crypt; visible as crypt elongation:                                                                                                           |              |                    |     |     |     |     |     |                            |     |     |     |     |     |     |   |   |
|                                    |                                                                                   | Minimal: <25%                                                                                                                                                                                                                                             | 1            | 1                  |     |     |     | 1   | 1   |                            |     | 1   | 1   |     |     |     |   |   |
|                                    |                                                                                   | Mild: 25-35%                                                                                                                                                                                                                                              | 2 or 3       |                    |     |     |     |     |     | 2                          |     |     |     |     |     |     | 3 |   |
|                                    |                                                                                   | Moderate: 36-50%; mitoses in middle/upper third of crypt epithelium, distant from crypt base                                                                                                                                                              | 3 or 4       |                    |     |     |     |     |     |                            |     |     |     |     |     |     |   |   |
|                                    | Marked: >51%; mitoses in upper third of crypt epithelium, distant from crypt base | 4 or 5                                                                                                                                                                                                                                                    |              |                    |     |     |     |     |     |                            |     |     |     |     |     |     |   |   |
|                                    | Goblet cell loss                                                                  | Reduction of goblet cell numbers relative to baseline goblet cell numbers per crypt:                                                                                                                                                                      |              |                    |     |     |     |     |     |                            |     |     |     |     |     |     |   |   |
|                                    |                                                                                   | Minimal: <20%                                                                                                                                                                                                                                             | 1 or 2       | 1                  |     | 1   | 1   |     | 1   | 1                          | 1   | 2   | 1   | 1   |     |     |   |   |
|                                    |                                                                                   | Mild: 21-35%                                                                                                                                                                                                                                              | 2 or 3       |                    |     |     |     |     |     |                            |     |     |     |     |     |     |   |   |
|                                    |                                                                                   | Moderate: 36-50%                                                                                                                                                                                                                                          | 3 or 4       |                    |     |     |     |     |     |                            |     |     |     |     |     |     |   |   |
|                                    | Marked: >50%                                                                      | 4                                                                                                                                                                                                                                                         |              |                    |     |     |     |     |     |                            |     |     |     |     |     |     |   |   |
|                                    | Cryptitis                                                                         | Neutrophils between crypt epithelial cells                                                                                                                                                                                                                | 2 or 3       | 2                  |     |     | 2   |     | 2   | 2                          |     | 2   | 2   |     |     |     |   |   |
|                                    | Crypt abscesses                                                                   | Neutrophils in crypt lumen                                                                                                                                                                                                                                | 3 to 5       |                    |     |     |     |     |     |                            |     |     |     |     |     |     |   |   |
|                                    | Erosion                                                                           | Loss of surface epithelium                                                                                                                                                                                                                                | 1 to 4       |                    |     |     |     |     |     |                            |     |     |     |     |     |     |   |   |
| III,<br>Mucosal architecture2      | Ulceration                                                                        | Epithelial defect reaching beyond muscularis mucosae                                                                                                                                                                                                      | 3 to 5       |                    |     |     |     |     |     |                            |     |     |     |     |     |     |   |   |
|                                    |                                                                                   | Connective tissue repair with new capillaries, surrounded by spindle-shaped fibroblasts, myofibroblasts, macrophages, neutrophils and mononuclear cells as well as cell debris; pseudopolyps: villiformous, hypertrophied areas projecting into the lumen | 4 or 5       |                    |     |     |     |     |     |                            |     |     |     |     |     |     |   |   |
|                                    | Irregular crypts                                                                  | Non-parallel crypts, variable crypt diameters, bifurcation and branched crypts                                                                                                                                                                            | 4 or 5       |                    |     |     |     |     |     |                            |     |     |     |     |     |     |   |   |
|                                    | Crypt loss                                                                        | Mucosa devoid of crypts                                                                                                                                                                                                                                   | 4 or 5       |                    |     |     |     |     |     |                            |     |     |     |     |     |     |   |   |
|                                    | Villous blunting                                                                  | Mild: villous-to-crypt-length ratio of 2:1 to 3:1                                                                                                                                                                                                         | 1 to 3       |                    |     |     |     |     |     |                            |     |     |     |     |     |     | 3 | 3 |
|                                    |                                                                                   | Moderate: villous-to-crypt-length ratio of 1:1 to 2:1                                                                                                                                                                                                     | 2 to 4       |                    |     |     |     |     |     |                            | 1   |     |     |     |     |     |   |   |
|                                    |                                                                                   | Villous atrophy                                                                                                                                                                                                                                           | 3 to 5       |                    |     |     |     |     |     | 1                          |     |     | 1   |     |     |     |   | 3 |
|                                    | Total                                                                             |                                                                                                                                                                                                                                                           | 6            | 0                  | 0   | 5   | 5   | 3   | 9   | 8                          | 3   | 10  | 6   | 11  | 8   |     |   |   |
